# Supplementary material for: Derivation of Neural Stem Cells from Human Adult Peripheral CD34+ Cells for an Autologous Model of Neuroinflammation
Source: PubMed Central journal article supplement (PMC3841177; doi:10.1371/journal.pone.0081720), 2013-11-26
Supplement: pone.0081720.s003.pdf [file pone.0081720.s003.pdf]

# Figure S3

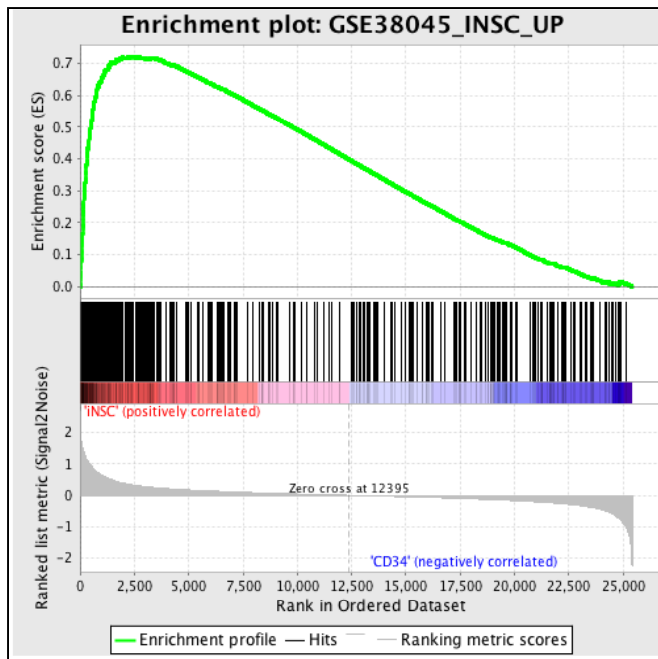

|                                   |                                                                                                       |
|-----------------------------------|-------------------------------------------------------------------------------------------------------|
| Dataset                           | DWang_GSEA022413_GSEA022413.iNSC_vs_CD34.cls<br>#iNSC_vs_CD34.iNSC_vs_CD34.cls<br>#iNSC_vs_CD34_repos |
| Phenotype                         | iNSC_vs_CD34.cls#iNSC_vs_CD34_repos                                                                   |
| Upregulated in class              | iNSC                                                                                                  |
| GeneSet                           | GSE38045_INSC_UP                                                                                      |
| Enrichment Score (ES)             | 0.7212686                                                                                             |
| Normalized Enrichment Score (NES) | 1.0734679                                                                                             |
| Nominal p-value                   | 0.0                                                                                                   |
| FDR q-value                       | 0.07713499                                                                                            |
| FWER p-Value                      | 0.0                                                                                                   |

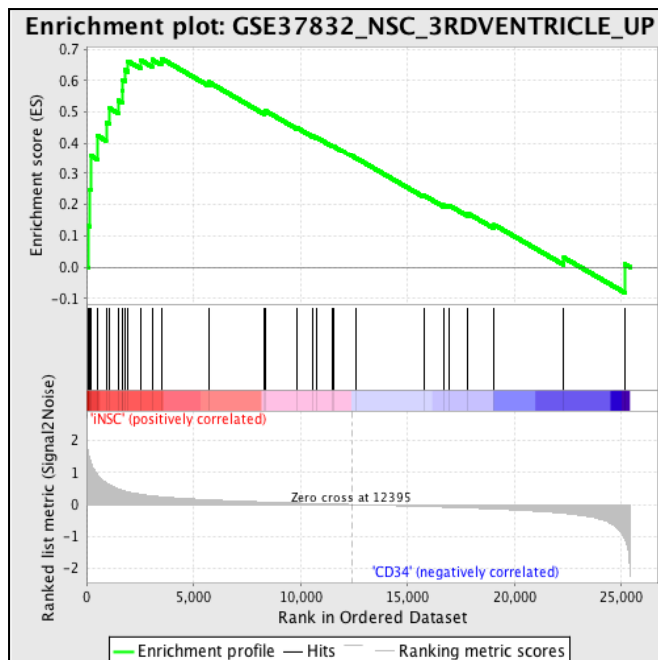

|                                   |                                                                                                       |
|-----------------------------------|-------------------------------------------------------------------------------------------------------|
| Dataset                           | DWang_GSEA022413_GSEA022413.iNSC_vs_CD34.cls<br>#iNSC_vs_CD34.iNSC_vs_CD34.cls<br>#iNSC_vs_CD34_repos |
| Phenotype                         | iNSC_vs_CD34.cls#iNSC_vs_CD34_repos                                                                   |
| Upregulated in class              | iNSC                                                                                                  |
| GeneSet                           | GSE38045_INSC_UP                                                                                      |
| Enrichment Score (ES)             | 0.7212686                                                                                             |
| Normalized Enrichment Score (NES) | 1.0734679                                                                                             |
| Nominal p-value                   | 0.0                                                                                                   |
| FDR q-value                       | 0.07713499                                                                                            |
| FWER p-Value                      | 0.0                                                                                                   |
