# Supplementary material for: Derivation of Neural Stem Cells from Human Adult Peripheral CD34+ Cells for an Autologous Model of Neuroinflammation
Source: PubMed Central journal article supplement (PMC3841177; doi:10.1371/journal.pone.0081720), 2013-11-26

Figure S4

P42

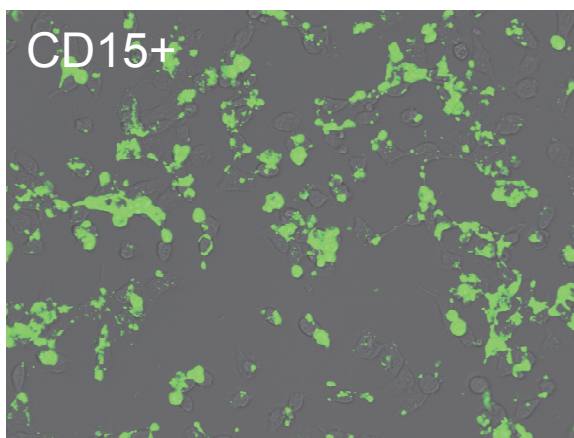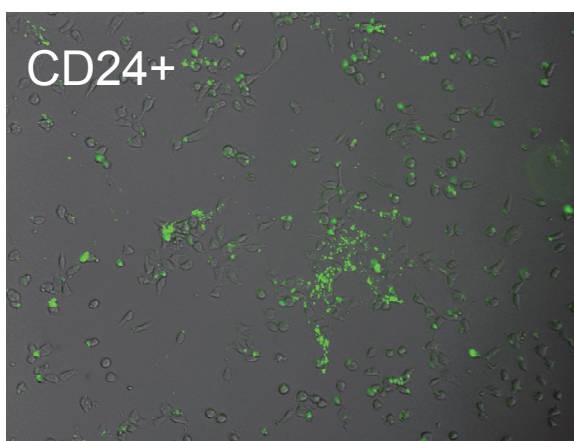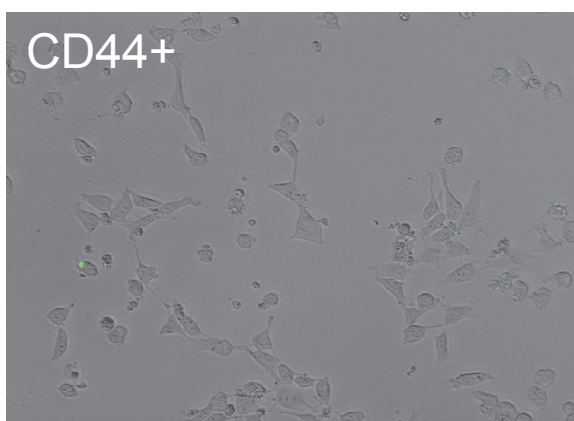

Supplement: pone.0081720.s004.pdf [file pone.0081720.s004.pdf]
